# Supplementary material
Source: Copernicus journal article supplement (doi:10.5194/essd-18-3587-2026)
Supplement: Supplementary file 1 [file essd-18-3587-2026-supplement.pdf]

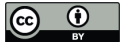

*Supplement of*

## **A Reanalysis-Based Global Tropical Cyclone Tracks Dataset for the Twentieth Century (RGTracks-20C)**

**Guiling Ye et al.**

*Correspondence to:* Jeremy Cheuk-Hin Leung ([chleung@pku.edu.cn](mailto:chleung@pku.edu.cn)) and Wenjie Dong ([dongwj3@mail.sysu.edu.cn](mailto:dongwj3@mail.sysu.edu.cn))

The copyright of individual parts of the supplement might differ from the article licence.

26 **Introduction**

27 This supporting information provides supplementary texts, figures, and tables cited in the main text.

28 **S1 Tracker Detection Performance**

29 Detailed figures comparing the Tracker's performance and characterizing the attributes of TC hits, misses,  
30 and false alarms are provided in this section.

31 **S1.1 Validity of trackers**

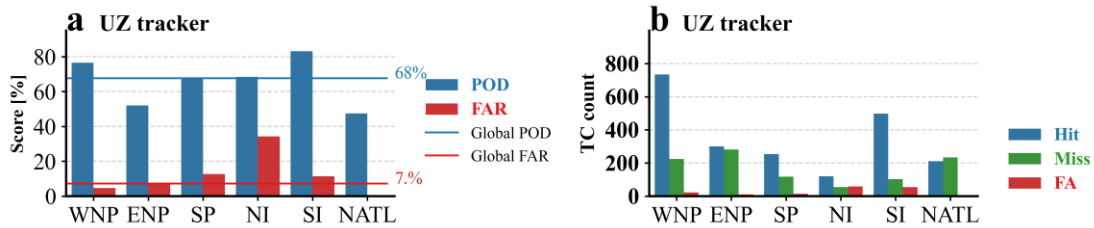

32

33 **Figure S1:** As in Fig. 3, but for the UZ tracker.

34 **Table S1:** The probability of detection (POD) and false alarm rate (FAR) of the global TCs detected by different  
35 trackers in the fifth generation ECMWF reanalysis (ERA5) and 20CRv3. POD (unit: %) and FAR (unit: %) of TCs  
36 detected by different trackers in the latest high-resolution ERA5 reanalysis by (Accarino et al., 2023) (green  
37 background), (Bourdin et al., 2022) (green background), UZ tracker (gray background) and RGTracks-20C (orange  
38 background).

|                | Hybrid <sup>1</sup> | CNRM <sup>2</sup> | TRACK <sup>2</sup> | UZ-ERA5 <sup>2</sup> | OWZ-ERA5 <sup>2</sup> | UZ-20CRv3 | OWZ-20CRv3 |
|----------------|---------------------|-------------------|--------------------|----------------------|-----------------------|-----------|------------|
| <b>POD (%)</b> | 71.49               | 72.77             | 74.37              | 71.54                | 71.75                 | 67.62     | 76.56      |
| <b>FAR (%)</b> | 23                  | 8.62              | 17.19              | 3.37                 | 17.43                 | 7.19      | 15.21      |

39

40

41

42

43

44

45

46

47

48

49 **S1.2 Characteristics of hit, missed, and false-alarm TCs**

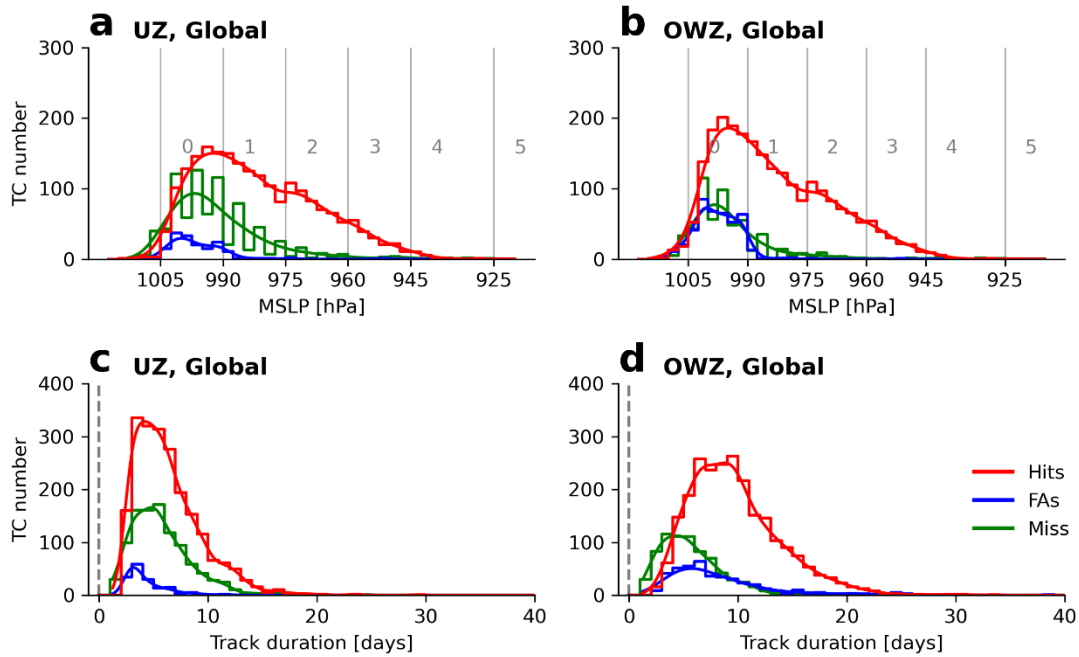

50  
 51 **Figure S2:** Properties of Hits, Misses, and False Alarms tracks for TC Trackers. a–b, Histograms of Hits (red),  
 52 Misses (green), and FAs (blue) TC cases against TC intensity (minimum sea level pressure ( $SLP_{min}$ ), unit:  $hPa$ , with  
 53 the storm categories as defined according to ‘\*TC classification’ shown with vertical gray lines) detected by the UZ  
 54 (a) and OWZ (b) trackers. c–d, same as a–b, except for histograms of Hits (red), Misses (green), and FAs (blue) TC  
 55 cases against TC duration (unit: days).

56 The differences between RGTracks-20C and IBTrACS are most evident in the ENP, NATL, and NI. In  
 57 the ENP and NATL, missed detections account for a relatively large fraction of the discrepancies, and  
 58 most of these missed systems are weak and short-lived (Figs. S3a–h). By contrast, the NI is characterized  
 59 more by a higher fraction of false alarms, which are mainly category 0–1 systems and tend to have  
 60 relatively longer lifetimes (Figs. S3i–l). In addition to tracker-related limitations, these differences may  
 61 also reflect uncertainties in the observational record in this basin.

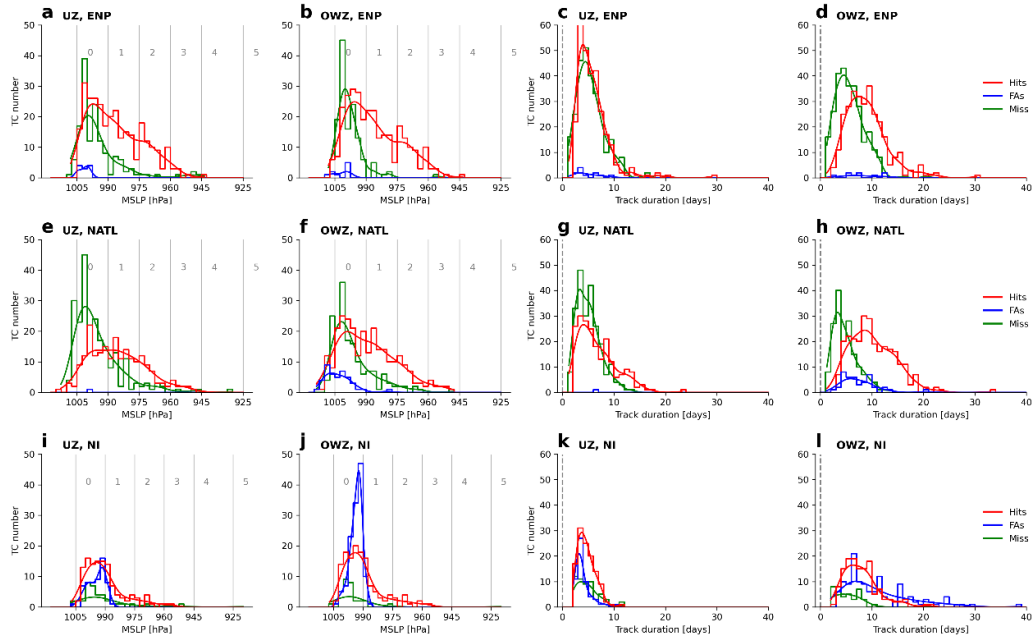

62

63 **Figure S3:** As in Fig. S2, but for the ENP, NATL, and NI. a–b, ENP, e–h, NATL, and i–l, NI. Histograms of TC  
 64 intensity ( $SLP_{min}$ , unit:  $hPa$ ) for the UZ tracker (a, e, i) and OWZ tracker (b, f, j), respectively. Histograms of TC  
 65 duration (unit: days) for the UZ tracker (c, g, k) and OWZ tracker (d, h, l), respectively.

66

67

68

69

70

71

72

73

74

75

76

77

78

79

80

81

82

83

84

85

86

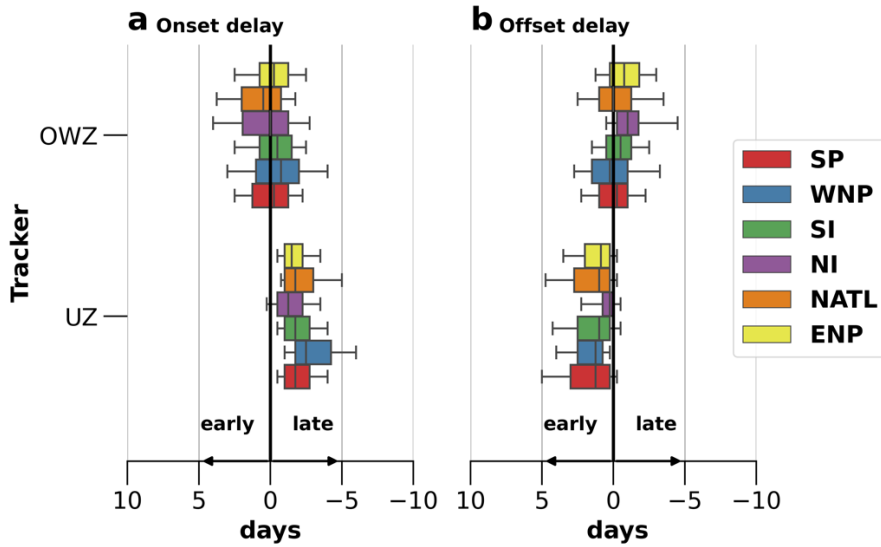

88  
 89 **Figure S4:** Onset and offset delays in TC detection by OWZ and UZ trackers. Onset delay (a): the delay between  
 90 the first detection by both trackers and the first record in IBTrACS. Offset delay (b): the delay between the last  
 91 detection by both trackers and the last record in IBTrACS. Colors represent different ocean basins: South Pacific  
 92 (SP)(red), western North Pacific (WNP) (blue), South Indian (SI) (green), NI (purple), NATL (orange), and ENP  
 93 (yellow). Box plots indicate the 25th, 50th, and 75th percentiles, whiskers show the 10th and 90th percentiles, and  
 94 outliers are not shown.

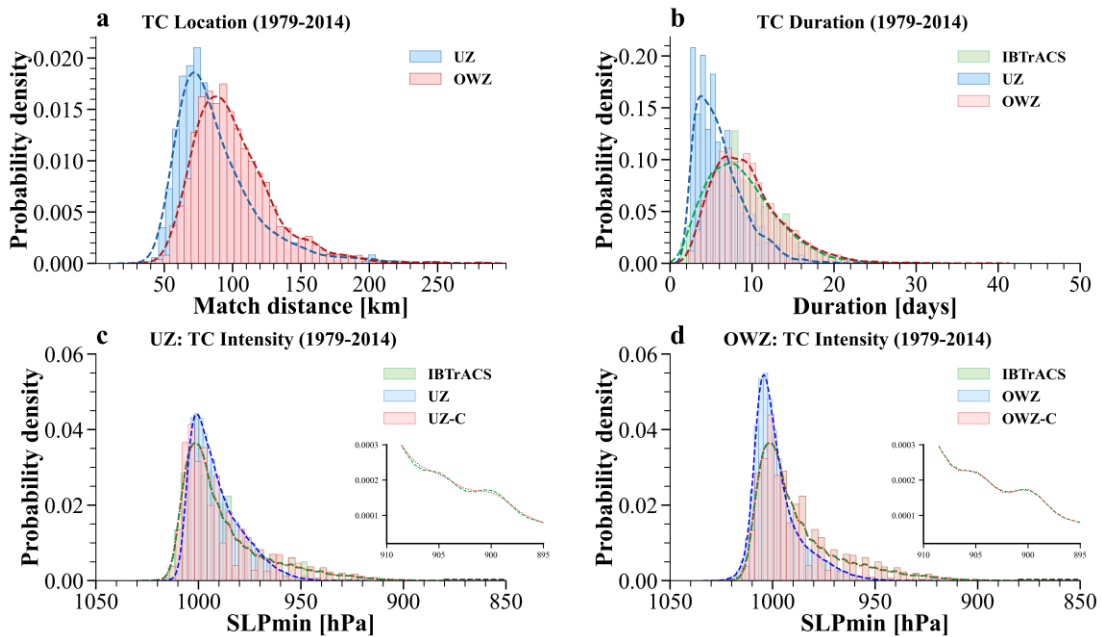

95  
 96 **Figure S5:** Distribution of TC characteristics on the IBTrACS and RGTracks-20C. a, Distribution of the mean TC  
 97 location error from 1979–2014 (unit: km) between IBTrACS and the RGTracks-20C by the UZ (blue) and OWZ  
 98 (red) algorithms. b, TC duration (unit: days) from 1979 to 2014 in IBTrACS (green) and the RGTracks-20C by the  
 99 UZ (blue) and OWZ (red) algorithms. c, same as (b), but for TC intensity ( $SLP_{min}$ , unit:  $hPa$ ), based on the UZ  
 100 tracker, before (blue) and after (red) bias correction. d, same as (c), but for the OWZ tracker. (UZ: UZ tracker, OWZ:  
 101 OWZ tracker. UZ-C and OWZ-C represent bias-corrected results for the UZ and OWZ trackers, respectively.)

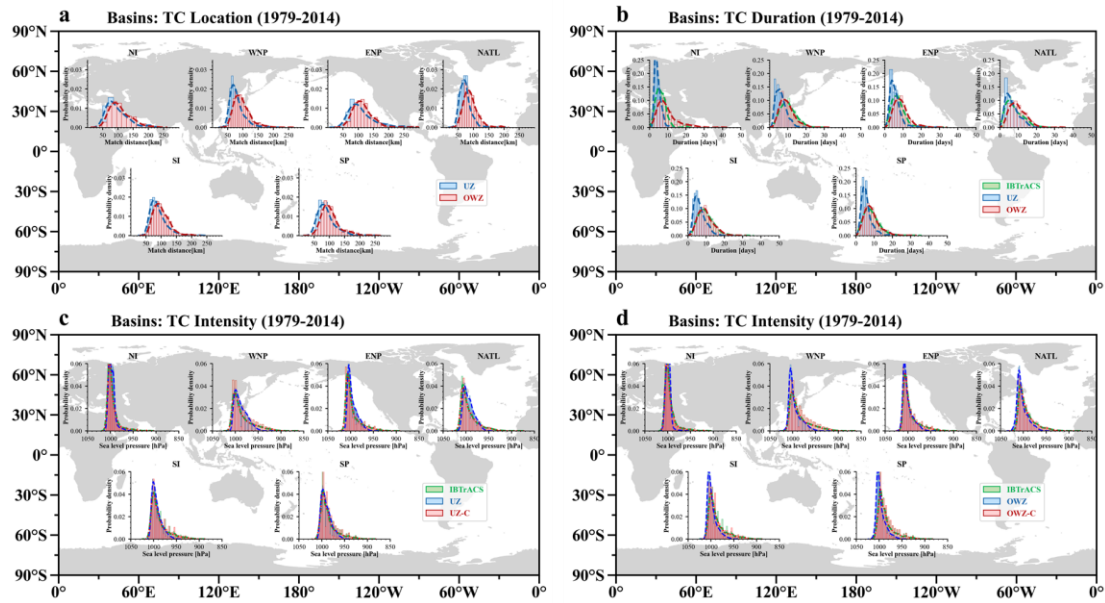

102  
103

Figure S6: As in Fig. S4, but for six individual basins.

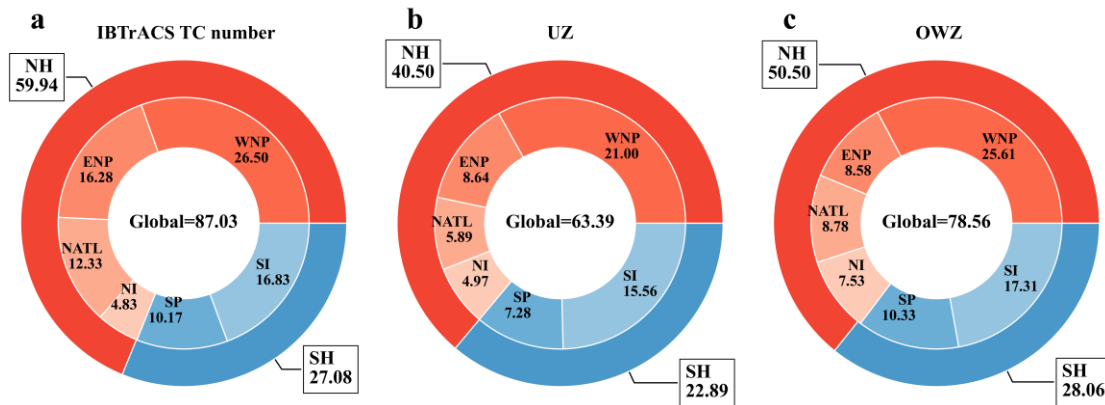

104  
105  
106  
107  
108  
109  
110  
111  
112  
113  
114  
115  
116  
117  
118  
119  
120  
121

Figure S7: The mean number of TCs per year globally and for the six basins from IBTrACS (a), and using the UZ (b) and OWZ (c) trackers.

122 **S3 ENP and NI**

123 **Table S2:** Correlation coefficients of TC activity (number, days, intensity) in the ENP and NI between IBTrACS,  
 124 RGTracks-20C and UZ tracker's results. This study initially verified the reliability of RGTracks-20C from 1979-  
 125 2014. However, considering the lack of observational data, the study periods for ENP and NI were selected from  
 126 1988-2014 and 1990-2014, respectively. Asterisks indicate the confidence levels, 1 asterisk (\*) = 90%, 2 asterisks  
 127 (\*\*)= 95%, and 3 asterisks (\*\*\*) = 99%.

| <b>Basin</b>       | <b>Characteristics</b> | <b>Period</b> | <b>UZ</b> | <b>RGTracks-20C</b> |         |
|--------------------|------------------------|---------------|-----------|---------------------|---------|
| <b>ENP</b>         | <b>Number</b>          | 1979-2014     | 0.41**    | 0.35**              |         |
|                    |                        | 1988-2014     | 0.77***   | 0.82***             |         |
|                    | <b>Duration</b>        | 1979-2014     | 0.65***   | 0.58***             |         |
|                    |                        | 1988-2014     | 0.89***   | 0.87***             |         |
|                    | <b>Intensity</b>       | 1979-2014     | 0.01      | 0.15                |         |
|                    |                        | 1988-2014     | 0.74***   | 0.66***             |         |
|                    | <b>Intensity-C</b>     | 1979-2014     | -0.02     | 0.11                |         |
|                    |                        | 1988-2014     | 0.71***   | 0.67***             |         |
|                    | <b>NI</b>              | <b>Number</b> | 1979-2014 | 0.49***             | 0.54*** |
|                    |                        |               | 1990-2014 | 0.58***             | 0.61*** |
| <b>Duration</b>    |                        | 1979-2014     | 0.62***   | 0.34**              |         |
|                    |                        | 1990-2014     | 0.63***   | 0.38*               |         |
| <b>Intensity</b>   |                        | 1979-2014     | 0.48***   | 0.36**              |         |
|                    |                        | 1990-2014     | 0.69***   | 0.62***             |         |
| <b>Intensity-C</b> |                        | 1979-2014     | 0.55***   | 0.47***             |         |
|                    |                        | 1990-2014     | 0.68***   | 0.68***             |         |

128

129

130

131

132

133

134

135 **Table S3:** Starting years of TC intensity ( $SLP_{min}$ ) recordings by different agencies across major ocean basins.  
 136 (Information provided by Dr. Jennifer Gahtan, NOAA's National Center for Environmental Information.)

| Basin               | Agencies           |             |              |        |       |        |         |        |
|---------------------|--------------------|-------------|--------------|--------|-------|--------|---------|--------|
| North Atlantic      | HURDAT2            | M Chenoweth | DS824        | TD9636 |       |        |         |        |
|                     | 1979* <sup>1</sup> | 1851        | 1851         | 1899   |       |        |         |        |
| East Pacific        | HURDAT2            |             |              | DS824  |       |        |         |        |
|                     | 1988               | 0           | 1949         |        |       |        |         |        |
| Central Pacific     | HURDAT2            |             |              |        |       |        |         |        |
|                     | 2001               |             |              |        |       |        |         |        |
| West Pacific        | China              | Japan       | HKO          | JTWC   | DS824 | TD9636 |         |        |
|                     | 1949               | 1951        | 1961         | 2001   | 1945  | 1945   |         |        |
| North Indian Ocean  | India              | JTWC        |              | DS824  |       |        |         |        |
|                     | 1990* <sup>2</sup> | 2001        | Mid-19070's  |        |       |        |         |        |
| Southern Hemisphere | La Reunion         | Australia   | New Zealand, | Nadi   | JTWC  | DS824  | Neumann | TD9636 |
|                     | 1977               | 1907        | 1968         | 1992   | 2001  | 1877   | 1960s   | 1956   |

137

**Note:**

138

\*1. North Atlantic: 1979 (with prior data given if there was a specific observation) HURDAT2.

139

\*2. North Indian Ocean: 1990 (soon to be 1982) India.

140

3. Multiple Basins 1945 TD9635.

141

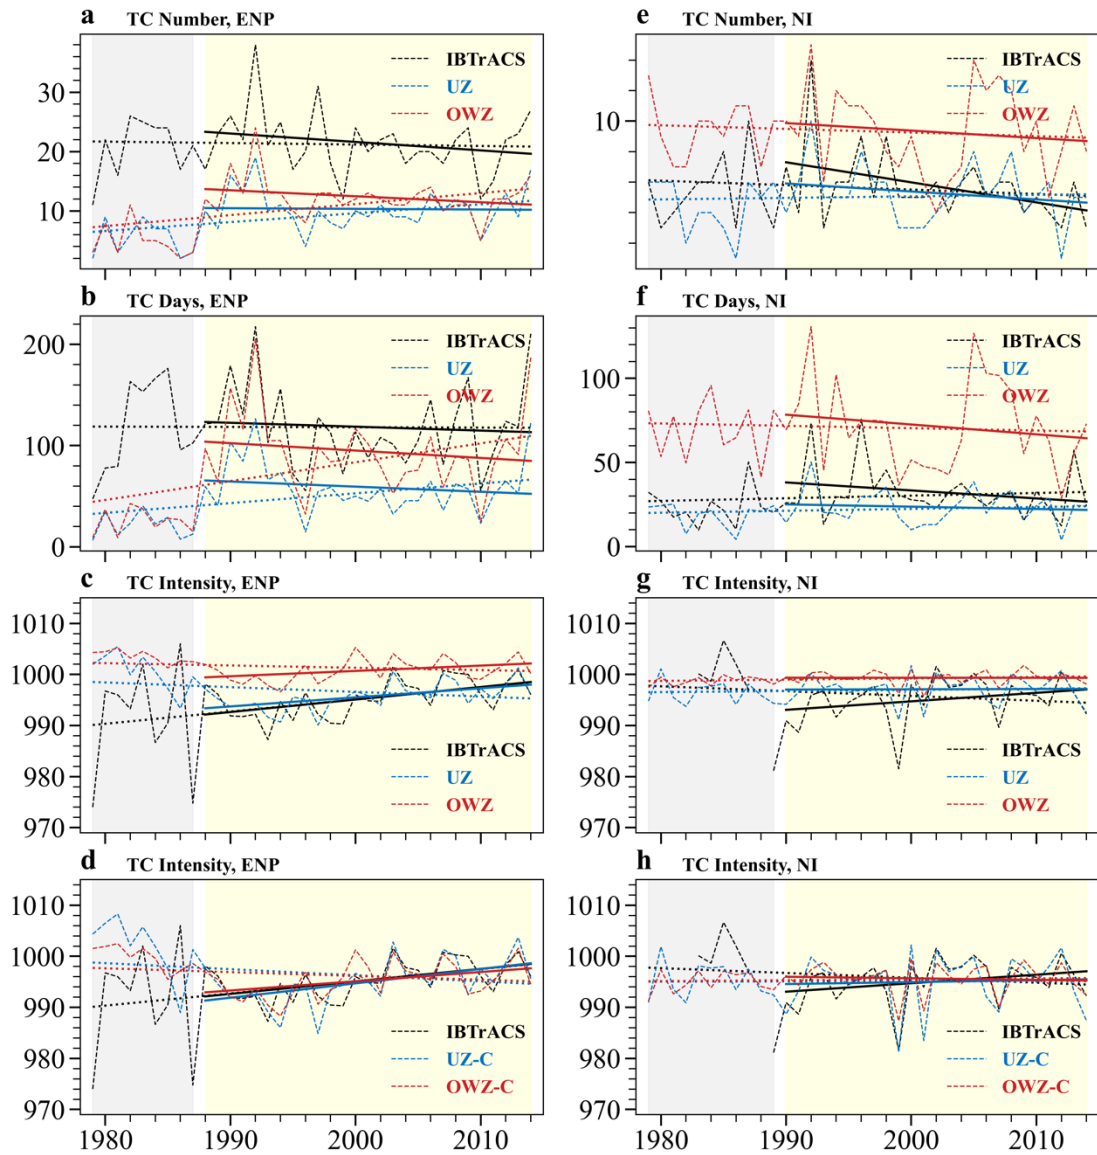

142  
 143  
 144  
 145  
 146  
 147  
 148  
 149  
 150  
 151  
 152  
 153  
 154

**Figure S8:** As in Fig. 4, but for the ENP and NI. a-d, time series and trends of TC number (unit:  $year^{-1}$ ) (a), days (unit:  $day \cdot year^{-1}$ ) (b), and intensity (unit:  $hPa \cdot year^{-1}$ ) before correction (c) and after bias correction (d), as recorded by IBTrACS (black) and UZ tracker (blue), and RGTracks-20C (red) in the ENP. e-h, same as a-d, but for time series and trends of TC number (e), days (f), and intensity before correction (g) and after bias correction (h), as recorded by IBTrACS, RGTracks-20C and UZ tracker in the NI.

155 **S4 TC activity trends**

156 Although longer-term changes are not the primary focus of the present study, we briefly compare the  
157 linear trends in TC activity between RGTracks-20C and IBTrACS in this section.

158 For TC number (Figs. 6a, 7a, and Table S4), based on IBTrACS, the WNP exhibit significant decreasing  
159 trends of  $-0.12 \text{ year}^{-1}$ . RGTracks-20C is able to reproduce the decreasing trends in these basins, with a  
160 significant decrease of  $-0.12 \text{ year}^{-1}$  for the WNP. In the NATL basin, RGTracks-20C is able to reproduce  
161 the significant increasing trend in TC number recorded by IBTrACS ( $0.24 \text{ year}^{-1}$ ), with the  $0.14 \text{ year}^{-1}$   
162 showing a significant increase consistent with observations. On a global scale, as well as in the NI and  
163 SI, the trends observed by IBTrACS are not statistically significant, and RGTracks-20C yields consistent  
164 results in these basins. Notably, in the ENP, there are significant differences in the long-term trends  
165 between IBTrACS and RGTracks-20C

166 For TC days (Figs. 6b, 7b, and Table S4), the RGTracks-20C reproduces the significant decreasing trend  
167 in the SP and the significant increasing trend in the NATL. In the WNP, the RGTracks-20C shows  
168 agreement with the observed long-term trend, although the trends are not significant. In addition, at the  
169 global scale and in the NI and SI, the RGTracks-20C well captures the observed insignificant long-term  
170 trends of TC days. On the other hand, in the ENP, there is a significant difference in the slopes of the  
171 long-term trends of IBTrACS and RGTracks-20C, which is consistent with the difference in the number  
172 of TCs between them

173 For TC intensity, the IBTrACS shows a significant increase in TC intensity globally ( $0.17 \text{ hPa} \cdot \text{year}^{-1}$ )  
174 and in the SI ( $0.27 \text{ hPa} \cdot \text{year}^{-1}$ ), and the increasing trend is successfully reproduced by the RGTracks-  
175 20C (Figs. 6c, 7c–d, and Table S4). In addition, the RGTracks-20C captures the insignificant trends in  
176 TC intensity over the WNP, NATL, NI, and SP. In summary, the RGTracks-20C shows high consistency  
177 with observations globally and in most regions. However, in the ENP, IBTrACS shows a significant  
178 increasing trend, while RGTracks-20C shows a non-significant decreasing trend.

179 Overall, the RGTracks-20C can generally reproduce the trends of TC activity in IBTrACS globally and  
180 over most of the basins. The corresponding UZ tracker's results also show similar longer-term behaviour  
181 (Figs. 6a–c), but the agreement with IBTrACS is weaker than that of RGTracks-20C, especially in the  
182 WNP, the most TC-active basin globally. Some discrepancies are observed in some specific basins,

183 especially the ENP and NI. These inconsistencies may be related to uncertainties in the observations and  
 184 limitations of tracking algorithms. If the evaluation period is restricted to the 1980s, the correlation  
 185 between RGTracks-20C and IBTrACS in recording TC activity improves significantly (Table S2), and  
 186 more consistent long-term trend results are obtained (Table S5).

187

188 **Table S4:** Linear trends in TC activity globally and across six basins, as recorded in IBTrACS, RGTracks-20C and  
 189 UZ tracker. Grey background indicates that the trends between IBTrACS and RGTracks-20C (UZ tracker)  
 190 are consistent sign and statistical significance. Asterisks indicate the confidence levels, 1 asterisk (\*) = 90%, 2 asterisks  
 191 (\*\*)= 95%, and 3 asterisks (\*\*\*) = 99%. UZ-C and OWZ-C represent results after intensity bias correction.

|                                               |                | Global  | WNP      | ENP     | NATL    | NI    | SI      | SP      |
|-----------------------------------------------|----------------|---------|----------|---------|---------|-------|---------|---------|
| <b>Number</b><br>( $year^{-1}$ )              | IBTrACS        | -0.06   | -0.12*   | -0.08   | 0.24*** | 0.01  | -0.04   | -0.10*  |
|                                               | UZ             | -0.01   | -0.14*   | 0.16*** | 0.07    | 0.02  | -0.01   | -0.12** |
|                                               | RGTracks-201   | 0.19    | -0.12*   | 0.20*** | 0.14**  | -0.04 | 0.04    | -0.08   |
| <b>TC days</b><br>( $day \cdot year^{-1}$ )   | IBTrACS        | -2.70   | -3.64*** | -0.03   | 1.93*** | 0.16  | -0.15   | -1.02*  |
|                                               | UZ             | -0.29   | -0.95    | 0.97**  | 0.59    | 0.11  | -0.40   | -0.72*  |
|                                               | RGTracks-20C   | 1.82    | -1.32    | 1.86*** | 1.38**  | -0.14 | 0.63    | -0.79*  |
| <b>Intensity</b><br>( $hPa \cdot year^{-1}$ ) | IBTrACS        | 0.17*** | 0.03     | 0.24**  | -0.06   | -0.09 | 0.27*** | 0.08    |
|                                               | UZ             | 0.03    | 0.01     | -0.09   | -0.06   | 0.03  | 0.05    | -0.06   |
|                                               | RGTracks-20C   | 0.05*** | 0.03     | -0.05   | -0.05   | 0.03  | 0.08*** | 0.03    |
|                                               | UZ-C           | 0.04    | 0.02     | -0.12   | -0.10   | 0.01  | 0.07    | -0.10   |
|                                               | RGTracks-20C-C | 0.09*** | 0.04     | -0.07   | -0.08   | 0.02  | 0.13*** | 0.05    |

192

193

194

195

196

197

198

199

200

201 **Table S5:** As in Table S4, but for ENP and NI. This study initially verified the reliability of RGTracks-20C and UZ-  
 202 based results for the period 1979–2014. Due to limited observational data, the study periods for the ENP and NI  
 203 basins were adjusted to 1988–2014 and 1990–2014, respectively.

| Basin       | Characteristics | Period    | IBTrACS        | UZ             | RGTracks-20C  |              |
|-------------|-----------------|-----------|----------------|----------------|---------------|--------------|
| ENP         | Number          | 1979-2014 | -0.08          | 0.16*          | 0.20*         |              |
|             |                 | 1988-2014 | <b>-0.04</b>   | <b>0</b>       | <b>-0.07</b>  |              |
|             | Duration        | 1979-2014 | -0.03          | 0.97*          | 1.86*         |              |
|             |                 | 1988-2014 | <b>-0.39</b>   | <b>-0.51</b>   | <b>-0.73</b>  |              |
|             | Intensity       | 1979-2014 | 0.24**         | -0.09          | -0.05         |              |
|             |                 | 1988-2014 | <b>0.24***</b> | <b>0.18***</b> | <b>0.10*</b>  |              |
|             | Intensity-C     | 1979-2014 | 0.24**         | -0.12          | -0.07         |              |
|             |                 | 1988-2014 | <b>0.24*</b>   | <b>0.28***</b> | <b>0.18**</b> |              |
|             | NI              | Number    | 1979-2014      | <b>0.01</b>    | <b>0.02</b>   | -0.04        |
|             |                 |           | 1990-2014      | <b>-0.07</b>   | <b>-0.04</b>  | <b>-0.06</b> |
| Duration    |                 | 1979-2014 | <b>0.16</b>    | <b>0.11</b>    | -0.14         |              |
|             |                 | 1990-2014 | <b>-0.48</b>   | <b>-0.14</b>   | <b>-0.58</b>  |              |
| Intensity   |                 | 1979-2014 | -0.09          | 0.03           | 0.03          |              |
|             |                 | 1990-2014 | <b>0.27</b>    | <b>0.03</b>    | <b>0.01</b>   |              |
| Intensity-C |                 | 1979-2014 | -0.09          | 0.01           | 0.02          |              |
|             |                 | 1990-2014 | <b>0.27</b>    | <b>0.06</b>    | -0.01         |              |

204  
 205  
 206  
 207  
 208  
 209  
 210  
 211  
 212  
 213

214 **Table S6:** Correlation coefficients of global TC activity (number, days, intensity) between RGTracks-20C (UZ-  
 215 based results) and IBTrACS with the ENP and NI included and excluded, respectively. Asterisks indicate the  
 216 confidence levels, 1 asterisk (\*) = 90%, 2 asterisks (\*\*) = 95%, and 3 asterisks (\*\*\*) = 99%.

| Characteristics            | Region            | UZ      | RGTracks-20C |
|----------------------------|-------------------|---------|--------------|
| <b>Number</b>              | ENP & NI included | 0.65*** | 0.68***      |
|                            | ENP & NI excluded | 0.67*** | 0.87***      |
| <b>Days</b>                | ENP & NI included | 0.78*** | 0.63***      |
|                            | ENP & NI excluded | 0.85*** | 0.70***      |
| <b>Corrected Intensity</b> | ENP & NI included | 0.58*** | 0.84***      |
|                            | ENP & NI excluded | 0.65*** | 0.85***      |

217

218 **Table S7:** As in Table S4, but with ENP and NI basins included and excluded, respectively.

| Characteristics  | Dataset        | ENP & NI included | ENP & NI excluded |
|------------------|----------------|-------------------|-------------------|
| <b>Number</b>    | IBTrACS        | -0.06             | 0.04              |
|                  | UZ             | -0.01             | -0.19**           |
|                  | RGTracks-20C   | 0.19              | 0.08              |
| <b>Duration</b>  | IBTrACS        | -2.70             | -2.83*            |
|                  | UZ             | -0.29             | -1.37*            |
|                  | RGTracks-20C   | 1.82              | 0.10              |
| <b>Intensity</b> | IBTrACS        | 0.17***           | 0.12***           |
|                  | UZ             | 0.03              | 0.02              |
|                  | OWZ            | 0.05***           | 0.05***           |
|                  | UZ-C           | 0.04              | 0.02              |
|                  | RGTracks-20C-C | 0.09***           | 0.09***           |

219

220

221

222

223

224 S5 Case studies

225 S5.1 1992 ‘Andrew’ hurricane

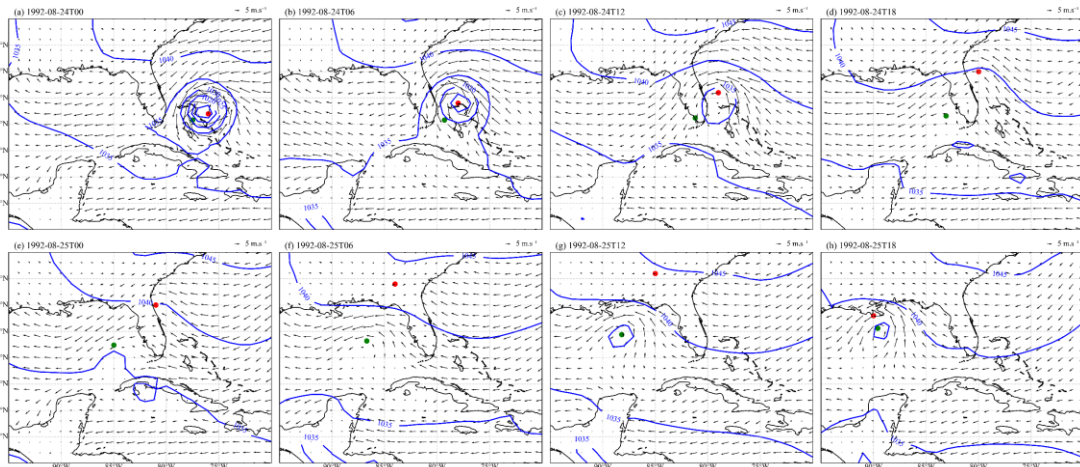

226  
227 **Figure S9:** Hurricane Andrew's August 24-25, 1992, sea level pressure (unit:  $hPa$ ) and wind speed at 10 m (unit:  $m \cdot s^{-1}$ )  
228 obtained from 20CRv3.

229 S5.2 1928 ‘Okeechobee’ hurricane

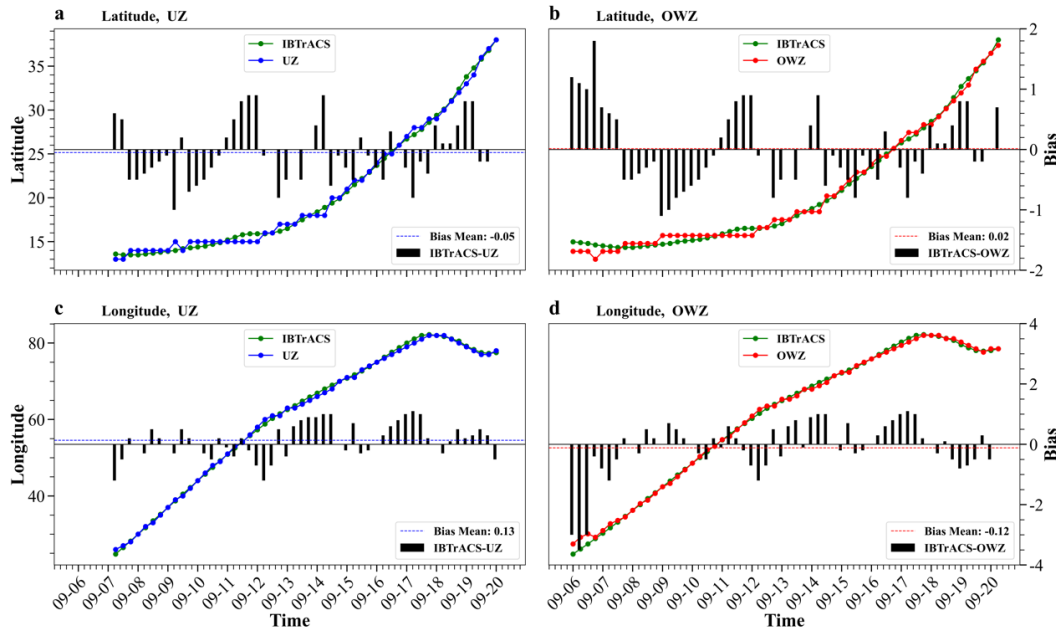

230  
231 **Figure S10:** Position records of Hurricane Okeechobee from IBTrACS, RGTracks-20C (The red dotted line  
232 represents the identification of TCs from the 20CRv3 reanalysis based on OWZ tracker) and UZ tracker, and analysis  
233 of positional bias between these two datasets. a-b, latitude (unit:  $^{\circ}$ ) records for Hurricane Okeechobee as reported by  
234 IBTrACS and the UZ tracker (a) and RGTracks-20C(b), with corresponding bias values shown in bar and dashed  
235 lines represent (UZ: -0.05, RGTracks-20C: 0.02). c-d, longitude (unit:  $^{\circ}$ ) records for Hurricane Okeechobee as  
236 reported by IBTrACS (green) and the UZ (blue) (c) and RGTracks-20C (red) (d) trackers, with corresponding bias  
237 values shown in bar and dashed lines represent (UZ: 0.13, RGTracks-20C: -0.12).

238  
239

240 **Table S8:** Intensities ( $SLP_{min}$ ) of Hurricane Okeechobee recorded in IBTrACS, RGTracks-20C and UZ tracker. The  
 241 World Meteorological Organization (WMO) and the United States of America (USA) agencies in IBTrACS recorded  
 242 the hurricane intensities. UZ and RGTracks-20C indicate the  $SLP_{min}$  directly obtained from 20CRv3, while UZ-C  
 243 and RGTracks-20C -C represent bias-corrected results based on observational data.

| Time            | WMO  | USA  | UZ  | RGTracks-20C | UZ-C | RGTracks-20C-C |
|-----------------|------|------|-----|--------------|------|----------------|
| 1928/9/12 18:00 | 940  | 940  | 971 | 972          | 955  | 940            |
| 1928/9/13 18:00 | 931  | 931  | 958 | 958          | 930  | 920            |
| 1928/9/13 21:00 |      | 936  |     |              |      |                |
| 1928/9/14 0:00  | 941  | 94   | 958 | 958          | 930  | 920            |
| 1928/9/17 0:00  | 929  | 929  | 955 | 955          | 925  | 915            |
| 1928/9/18 6:00  | 977  | 977  | 958 | 958          | 982  | 965            |
| 1928/9/18 9:00  |      | 976  |     |              |      |                |
| 1928/9/18 12:00 | 976  | 976  | 985 | 985          | 982  | 965            |
| 1928/9/18 15:00 |      | 976  |     |              |      |                |
| 1928/9/18 18:00 | 977  | 977  | 986 | 986          | 983  | 966            |
| 1928/9/18 19:00 | 977  | 977  |     |              |      |                |
| 1928/9/20 12:00 | 1008 | 1008 |     |              |      |                |
| 1928/9/20 15:00 |      | 1006 |     |              |      |                |
| 1928/9/20 18:00 |      | 1005 |     |              |      |                |

244

### 245 **S5.3 1920 ‘1920232N24150’ Typhoon in the WNP**

246 The typhoon labeled ‘1920232N24150’ occurred in the WNP in 1920. According to meteorological  
 247 records from Kagawa Prefecture of Japan ([https://www.shikoku-  
 248 saigai.com/archives/25443?preurl&query\\_pref&query\\_city&query\\_dis\\_kind&query\\_s=%E5%8F%B0  
 249 %E9%A2%A8+&query\\_date=18680908-19261225&query\\_paged=11](https://www.shikoku-saigai.com/archives/25443?preurl&query_pref&query_city&query_dis_kind&query_s=%E5%8F%B0%E9%A2%A8+&query_date=18680908-19261225&query_paged=11)), the typhoon brought 20 to 110  
 250 mm of rainfall to the region between August 20 and 21. Although the typhoon had a short duration and  
 251 caused relatively low rainfall, it damaged crops, particularly fruit trees and vegetables, indicating that it  
 252 made landfall in Japan.

253 While the IBTrACS provides a record of this typhoon, it includes only part of the storm's tracks,  
 254 especially missing the tracks during its landfall in Japan (August 20–21). However, the RGTracks-20C

255 successfully reconstructs the typhoon's tracks. To verify the accuracy of the track in the RGTracks-20C,  
256 we used the 20CRv3 to generate sea level pressure maps for August 19 to 21, 1920, and compared them  
257 with historical weather chart archives (Figs. S11–13).  
258

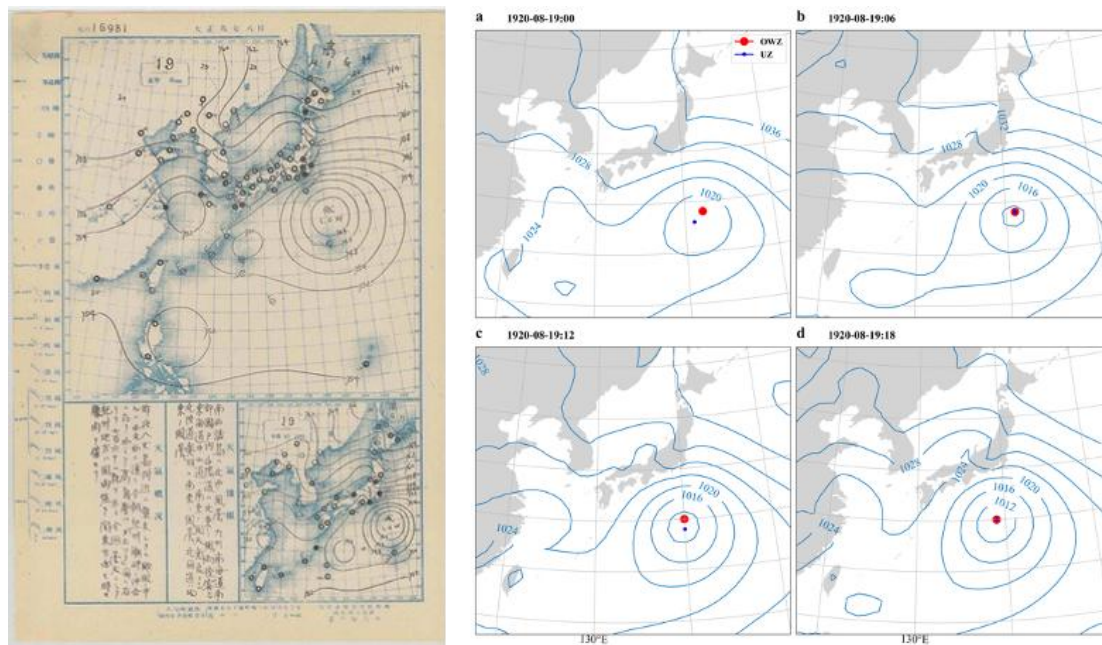

259  
260 **Figure S11:** Comparison of the historical Asia-Pacific weather map and sea-level pressure from 20CRv3 for the  
261 1920 typhoon '1920232N24150' on August 19, 1920. On the left is a historical Asia-Pacific weather map provided  
262 by the National Institute of Informatics (NII). a-d, Sea level pressure on August 20, 1920 at 00:00 (a), 06:00 (b),  
263 12:00 (c), and 18:00 (d) based on 20CRv3. The blue and red dots indicate the positions of the typhoon as identified  
264 by the UZ (blue) and OWZ (red) trackers, respectively. The historical weather chart was created by NII "Digital  
265 Typhoon" based on "Weather Charts" from Japan Meteorological Agency and obtained from  
266 <https://agora.ex.nii.ac.jp/digital-typhoon/weather-chart/>.

267 Historical weather charts provided by the National Institute of Informatics (NII) confirm the presence of  
268 a low-pressure system southeast of Japan on August 19 (Fig. S11). By August 20 (Fig. S12), the system  
269 was moving northwestward, approaching the Japanese coast, and by August 21 (Fig. S13), it was located  
270 over Japan's southern islands, further confirming its landfall.

271 A comparison with historical weather charts shows that the low-pressure system in 20CRv3 closely  
272 matches the observation records, indicating that 20CRv3 effectively simulated the typhoon's  
273 development and landfall in Japan. Thus, RGTracks-20C not only captures the typhoon's tracks but also  
274 accurately represents the pre-landfall (Fig. S11), landfall (Fig. S12), and post-landfall phases (Fig. S13).  
275 This reconstruction fills the gaps in IBTrACS regarding the missing tracks of the typhoon during this  
276 period.

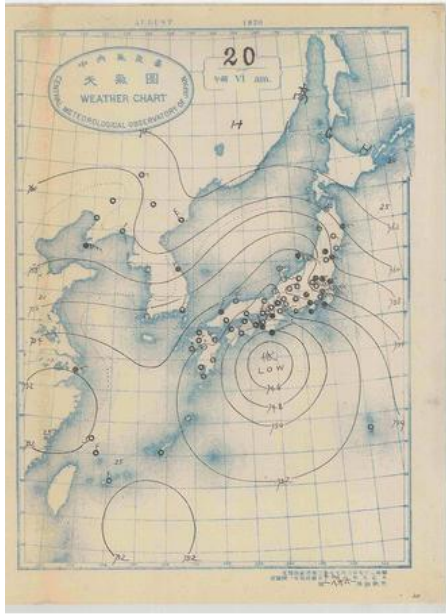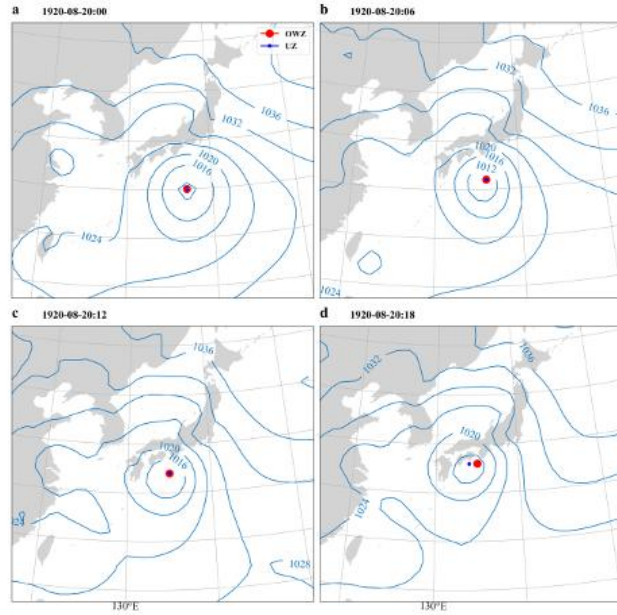

277  
278  
279  
280

**Figure S12:** As shown in Fig. S11, but for August 20, 1920. The historical weather chart was created by NII "Digital Typhoon" based on "Weather Charts" from Japan Meteorological Agency and obtained from <https://agora.ex.nii.ac.jp/digital-typhoon/weather-chart/>.

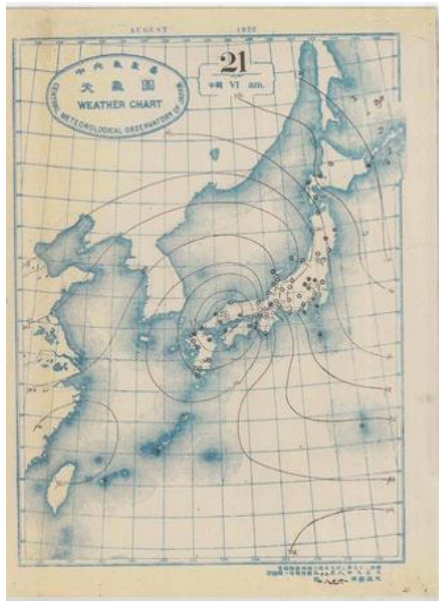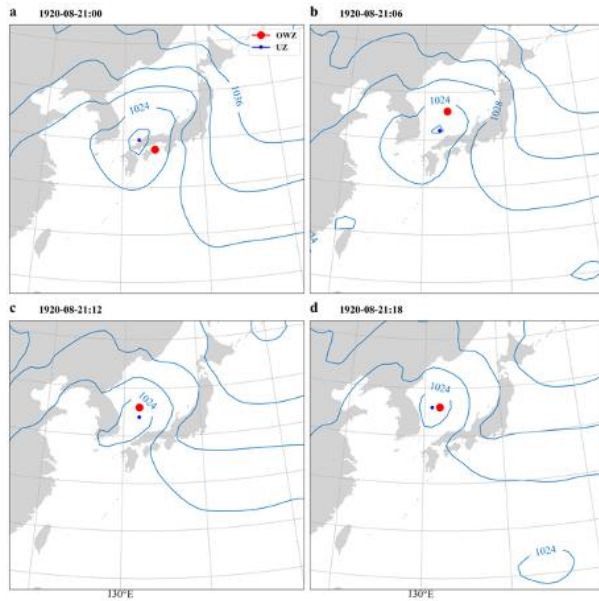

281  
282  
283  
284  
285  
286  
287  
288  
289

**Figure S13:** As shown in Fig. S11, but for August 21, 1920. The historical weather chart was created by NII "Digital Typhoon" based on "Weather Charts" from Japan Meteorological Agency and obtained from <https://agora.ex.nii.ac.jp/digital-typhoon/weather-chart/>.

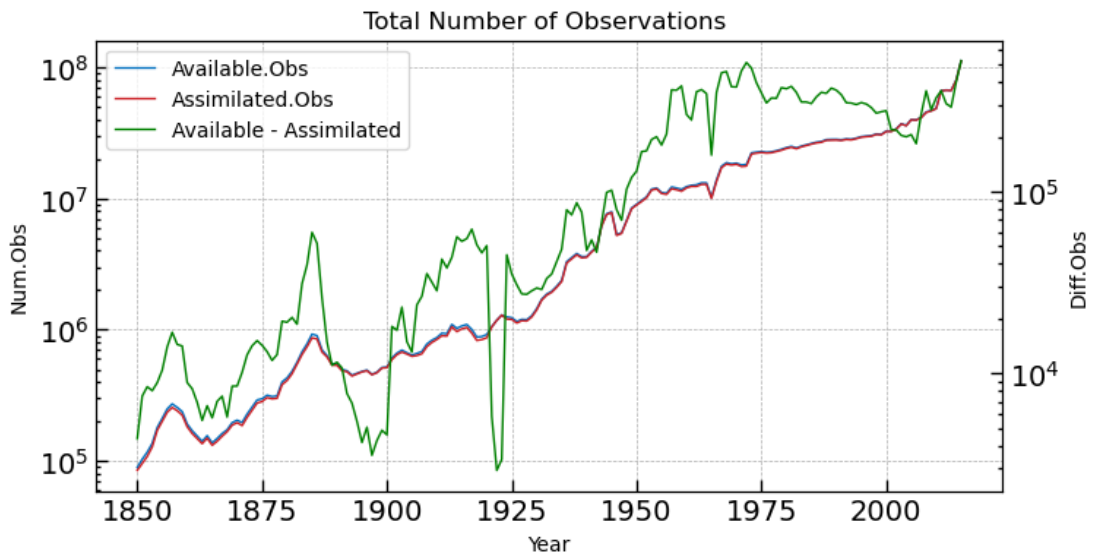

291  
 292 **Figure S14:** Time series of the total number of available and assimilable observations from 1850 to 2015. Blue and  
 293 red lines represent assimilable and assimilated observations, respectively. And the green line indicates the difference  
 294 between the available and assimilated observations.

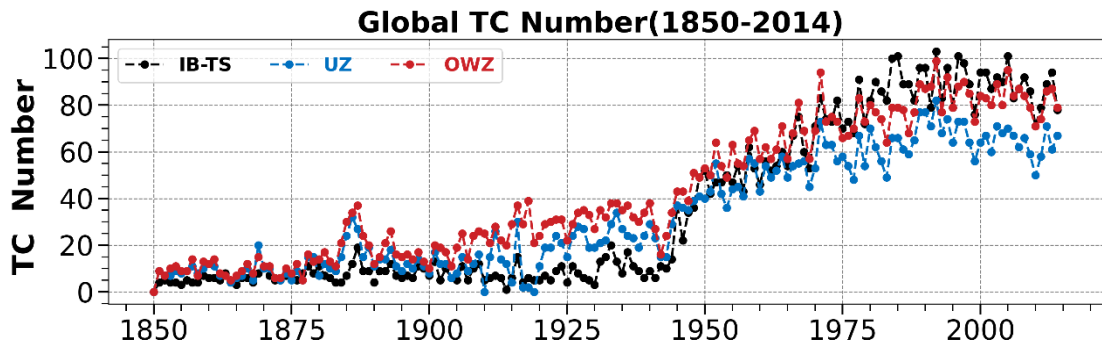

295  
 296 **Figure S15:** Time series of the TC number from 1850 to 2014. The black dotted line represents the IBTrACS, while  
 297 the blue and red dotted lines represent UZ tracker and RGTracks-20C, respectively.

298  
 299  
 300  
 301  
 302  
 303  
 304  
 305  
 306

307 **References**

308 Accarino, G., Donno, D., Immorlano, F., Elia, D., and Aloisio, G.: An Ensemble Machine Learning  
309 Approach for Tropical Cyclone Localization and Tracking From ERA5 Reanalysis Data, *Earth*  
310 *Space Sci.*, 10, e2023EA003106, <https://doi.org/10.1029/2023EA003106>, 2023.

311 Bell, S. S., Chand, S. S., Tory, K. J., and Turville, C.: Statistical Assessment of the OWZ Tropical Cyclone  
312 Tracking Scheme in ERA-Interim, *J. Clim.*, 31, 2217–2232, [https://doi.org/10.1175/JCLI-D-17-](https://doi.org/10.1175/JCLI-D-17-0548.1)  
313 0548.1, 2018.

314 Bourdin, S., Fromang, S., Dulac, W., Cattiaux, J., and Chauvin, F.: Intercomparison of four algorithms  
315 for detecting tropical cyclones using ERA5, *Geosci. Model Dev.*, 15, 6759–6786,  
316 <https://doi.org/10.5194/gmd-15-6759-2022>, 2022.

317
